# Supplementary material for: The Ethical Dimension of Peer Review: Insights from Editors of Philosophy Journals in Spain
Source: Research Square preprint supplement (doi:10.21203/rs.3.rs-8107730/v1), 2025-11-27
Supplement: Supplementary file 1 [file 39451d7f2cc7e7176e341e88.docx]

**Additional file 1: List of participating journals**

The following 46 philosophy journals based in Spain participated in the survey.

| 1 | Agora. Papeles de Filosofía | 24 | Espíritu |
| --- | --- | --- | --- |
| 2 | Anales del Seminario de la Historia de la filosofía | 25 | Estudios Filosóficos |
| 3 | Anuario Filosófico | 26 | Haser |
| 4 | Araucaria | 27 | Investigaciones Fenomenológicas |
| 5 | Argumentos de Razón Técnica | 28 | Isegoría |
| 6 | Azafea | 29 | Logos |
| 7 | Bajo Palabra. Revista de Filosofía | 30 | Oxímora |
| 8 | Comprendre | 31 | Paideia. Revista de Filosofía y Didáctica de la Filosofía |
| 9 | Constelaciones | 32 | Pensamiento |
| 10 | Con-Textos Kantianos (CTK) | 33 | Pensamiento al margen |
| 11 | Contrastes | 34 | Quaderns de Filosofía |
| 12 | Cuadernos de Pensamiento | 35 | Razón Española |
| 13 | Cuadernos Electrónicos de Filosofía del Derecho | 36 | Recerca. Revista de Pensament i Anàlisi |
| 14 | Cuadernos Salmantinos de Filosofía | 37 | Relectiones |
| 15 | Daimon | 38 | Revista de Filosofía (UCM) |
| 16 | Diálogo Filosófico | 39 | Revista de Hispanismo Filosófico |
| 17 | Differenz | 40 | Revista de Paz y Conflictos |
| 18 | Dilemata | 41 | Revista Iberoamericana de Argumentación (RIA) |
| 19 | Disputatio | 42 | Revista Internacional de Pensamiento Político |
| 20 | Dókos.Philosophical Review | 43 | Revista Telemática de Filosofía del Derecho |
| 21 | Endoxa | 44 | Scio.Revista de Filosofía. |
| 22 | Enrahonar | 45 | Theoria |
| 23 | Espíritu | 46 | Universitas. Revista de Filosofía, Derecho y Política |
